# Supplementary material for: The role of exopolymeric substances in the bioaccumulation and toxicity of Ag nanoparticles to algae
Source: PubMed Central journal article supplement (PMC5018811; doi:10.1038/srep32998), 2016-09-12
Supplement: srep32998-s1.pdf [file srep32998-s1.pdf]

1 **Supplementary information**

2 **The role of exopolymeric substances in the bioaccumulation and toxicity of Ag nanoparticles**  
3 **to algae**

4 **Kaijun Zhou<sup>1</sup>, Yi Hu<sup>1</sup>, Luqing Zhang<sup>1</sup>, Kun Yang<sup>1,2</sup>, Daohui Lin<sup>1,2,\*</sup>**

5 1. Department of Environmental Science, Zhejiang University, Hangzhou 310058, China

6 2. Zhejiang Provincial Key Laboratory of Organic Pollution Process and Control, Zhejiang  
7 University, Hangzhou 310058, China

8 \*Corresponding author: Tel.: +86 571 88982582; fax: +86 571 88982590.

9 E-mail address: [lindaohui@zju.edu.cn](mailto:lindaohui@zju.edu.cn) (D. Lin)

## 10 **Experimental Procedures**

11 **Synthesis of AgNPs.** Citrate stabilized AgNPs (C-AgNPs) were synthesized according to the  
12 reported method<sup>[1]</sup> from a standard reduction of the silver salt in sodium citrate. One hundred mL  
13 solutions of sodium citrate (0.31 mM), AgNO<sub>3</sub> (0.25 mM) and sodium borohydride (NaBH<sub>4</sub>, 0.25  
14 mM) were prepared in pure water and kept at 4 °C in darkness for 30 min. The AgNO<sub>3</sub> and sodium  
15 citrate solutions were mixed together in a conical flask and vigorously stirred. Six mL of the NaBH<sub>4</sub>  
16 solution was added into the mixture. After stirring for 10 min, the solution was heated slowly to  
17 boiling for 90 min, left overnight and then cooled (4 °C, in darkness), and collected as the C-AgNP  
18 suspension. While polyvinyl pyrrolidone (PVP) stabilized AgNPs (P-AgNPs) were synthesized  
19 according the reported method<sup>[2]</sup> from the reduction of the silver salt in PVP<sub>10</sub>. One hundred mL  
20 solutions of PVP<sub>10</sub> (2 mM), AgNO<sub>3</sub> (1 mM) and NaBH<sub>4</sub> (4 mM) were prepared in pure water and  
21 kept at 4 °C in darkness for 30 min. The PVP<sub>10</sub> and NaBH<sub>4</sub> solutions were mixed together and  
22 vigorously stirred. 70 mL of the AgNO<sub>3</sub> solution was added into the mixture, then the stirring was  
23 stopped simultaneously, and the suspension was left overnight and collected as the P-AgNP  
24 suspension. Both the obtained C-AgNP and P-AgNP suspensions were cleaned at least three times  
25 using the ultrafiltration method (Ultrafiltration centrifuge tube, 3 KDa, Millipore, USA) to remove  
26 the excessive reactants, preventing aggregation and drying. The cleaned AgNP suspensions were  
27 kept in darkness at 4 °C.

28 **EPS extraction.** EPS were extracted by the cation exchange resin method<sup>[3]</sup>. *Chlorella pyrenoidosa*  
29 was cultivated to the stationary phase and was harvested by the centrifugation at 2500g. After being  
30 washed twice by the culture medium, the algae were mixed with 2.5 g/(biomass) g cation exchange  
31 resin (Dowex Marathon C) and stirred at 600 rpm for 1.5 h. Then the mixture was centrifuged at  
32 12000g for 15 min. The supernatant rich of EPS was desalinated, concentrated by an ultrafiltration  
33 system (Sartorius Vivaflow200, Germany), and freeze-dried to get the EPS solid. The harvested  
34 EPS were stored at -20 °C before using.

35 **TEM observation, Live/Dead test and growth assay of algae with or without EPS.** After the  
36 EPS extraction, the remaining algae were collected and regarded as the algae without EPS. The  
37 transmission electron microscope (TEM) characterization, Live/Dead test<sup>[4]</sup>, and 96h growth assay  
38 were performed to assess the potential effect of the EPS extraction on the algae. For the TEM  
39 observation, algae with or without EPS were dyed by the polysaccharide stain uranyl acetate. A  
40 drop of algal suspension was air-dried onto a copper grid and was observed by using a TEM

41 (JEM-1230, Japan). The Live/Dead BacLight Bacterial Viability Kit (Invitrogen/Molecular Probes,  
42 USA) was used to distinguish live and dead cells, which utilized mixtures of green-fluorescent  
43 nucleic acid stain (SYTO 9) and red-fluorescent nucleic acid stain (propidium iodide, PI). The  
44 SYTO 9 stain generally labels all cells when used alone, while PI can only penetrate cells with  
45 damaged membranes, causing a reduction in the SYTO 9 stain fluorescence when both dyes are  
46 present. The stained cells were imaged with a fluorescence microscope (FM, Nikon Eclipse Ni,  
47 Japan), and the live and dead cells were distinguished. For the 96h growth assay, algae ( $1.5 \times 10^5$   
48 cells/mL) were cultured in a 250 mL Erlenmeyer flask containing 100 mL of the OECD medium.  
49 The flasks were kept on a rotary shaker (120 rpm) at 25 °C with illumination by white incandescent  
50 lights ( $70 \mu\text{mol photons/m}^2/\text{s}$ , light:dark of 14:10h). After being cultivated for different times (12,  
51 24, 48, 72, 96, and 120 h), the algal cells in the media were counted using a counting chamber under  
52 a light microscope (LM, Olympus, CX21, Japan).

53 **The secretion kinetics of extracellular protein.** As one of the major components of EPS,  
54 extracellular protein was measured to evaluate the EPS content. The intact algae or algae with EPS  
55 extracted ( $10^6$  cells/mL) were exposed in the OECD medium with or without Ag ( $50 \mu\text{g/L}$  AgNPs or  
56  $10 \mu\text{g/L}$   $\text{AgNO}_3$ ), and cultured in an incubator (120 rpm) at 25 °C in darkness. Then the algal cells  
57 were collected by centrifugation at 2500g for 10 min after the exposure for different times. The EPS  
58 on the cell surfaces were extracted by the cation exchange resin method as above. The concentration  
59 of extracellular protein in the EPS was measured by the bicinchoninic acid assay<sup>[5]</sup>.

60 **The effect of EPS on FTIR spectra of AgNPs.** The EPS solution ( $250 \text{ mg/L}$ ) was mixed with the  
61 AgNP suspensions ( $100 \text{ mg/L}$ ), shaking for 24 h at 25 °C in darkness. The stock AgNP suspensions  
62 and the EPS-AgNP mixtures were both centrifuged at 15000g for 30 min to collect the AgNP and  
63 EPS-coated AgNP precipitates, respectively. The collected precipitates were washed twice with  
64 ultrapure water and freeze dried. The FTIR spectra of 1 mg of EPS, AgNPs or EPS-coated AgNPs  
65 mixed with 99 mg of KBr powder were obtained on an infrared spectroscope (Nicolet 6700,  
66 Thermo scientific, USA).

## 67 **References**

- 68 1. Romer, I. et al. Aggregation and dispersion of silver nanoparticles in exposure media for  
69 aquatic toxicity tests. *J. Chromatogr. A* **1218**, 4226–4233 (2011).
- 70 2. Mulfinger, L. et al. Synthesis and study of silver nanoparticles. *J. Chem. Educ.* **84**, 322 (2007).

- 71 3. Long, G. Y., Zhu, P. T., Shen, Y. & Tong, M. P. Influence of extracellular polymeric substances  
72 (EPS) on deposition kinetics of bacteria. *Environ. Sci. Technol.* **43**, 2308–2314 (2009).
- 73 4. Ivanova, I. A. et al. Determination of pseudomonas putida live cells with classic cultivation and  
74 staining with “live/dead baclight bacterial viability kit”. *Biotechnol. Biotechnol. Equip.* **24**,  
75 567–570 (2014).
- 76 5. Walker, J. M. The bicinchoninic acid (BCA) assay for protein quantitation. *Methods Mol. Biol.*  
77 **32**, 11–14 (1994).

78 **Table S1.** The effect of different concentrations of AgNPs on the position and strength of  
 79 three-dimension excitation (220–400 nm) and emission (300–550 nm) matrix fluorescence peaks of  
 80 25 mg/L EPS.

| Ag<br>concen.<br>(mg/L) | C-AgNPs |          |         |          | P-AgNPs |          |         |          |
|-------------------------|---------|----------|---------|----------|---------|----------|---------|----------|
|                         | Peak A  |          | Peak B  |          | Peak A  |          | Peak B  |          |
|                         | Ex/Em   | strength | Ex/Em   | strength | Ex/Em   | strength | Ex/Em   | strength |
| 0                       | 225/306 | 34.7     | 270/364 | 30.6     | 225/306 | 34.7     | 270/364 | 30.6     |
| 5                       | 225/302 | 34.1     | 270/362 | 28.2     | 225/302 | 29.3     | 270/356 | 25.8     |
| 10                      | 225/298 | 28.9     | 270/360 | 24.2     | 225/302 | 25.7     | 270/356 | 20.4     |
| 15                      | 225/300 | 26.6     | 270/358 | 21.3     | 225/304 | 20.7     | 270/354 | 15.7     |
| 20                      | 225/302 | 22.7     | 270/358 | 19.0     | 225/304 | 14.3     | 275/352 | 11.0     |
| 25                      | 225/304 | 18.4     | 270/354 | 14.0     | 225/302 | 11.8     | 275/308 | 12.0     |

81

82  
83  
84  
85  
86  
87  
88  
89

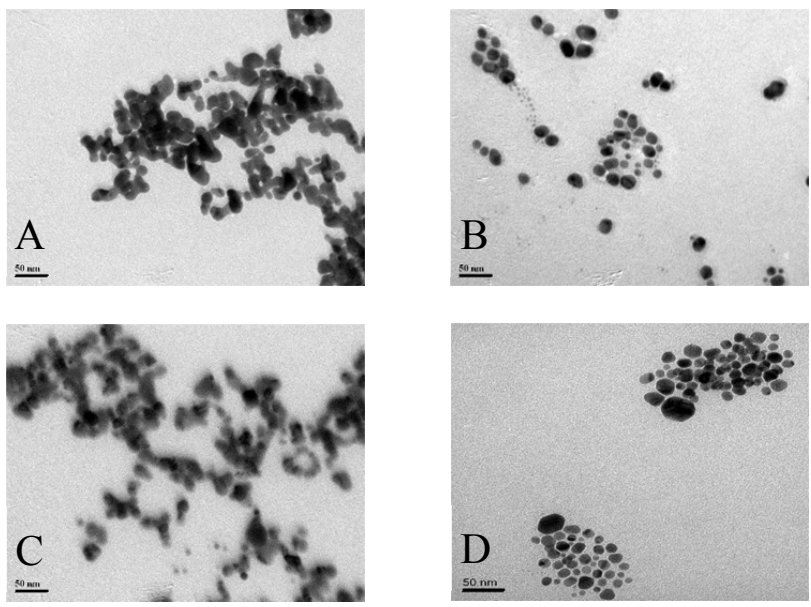

90 **Fig S1.** Transmission electron microscope images C-AgNPs (A and C) and P-AgNPs (B and D) in  
91 the absence (A and B) and presence (C and D) of 25 mg/L EPS.

92  
93  
94  
95  
96  
97  
98

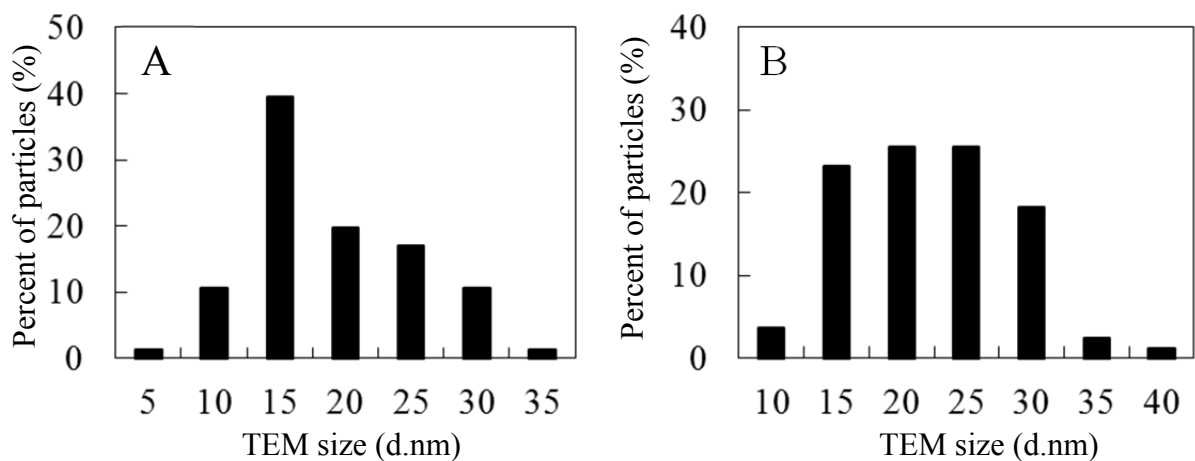

99 **Fig S2.** Size distribution of C-AgNPs (A) and P-AgNPs (B) measured for the particles ( $n > 100$ )  
100 shown in the transmission electron microscope images.

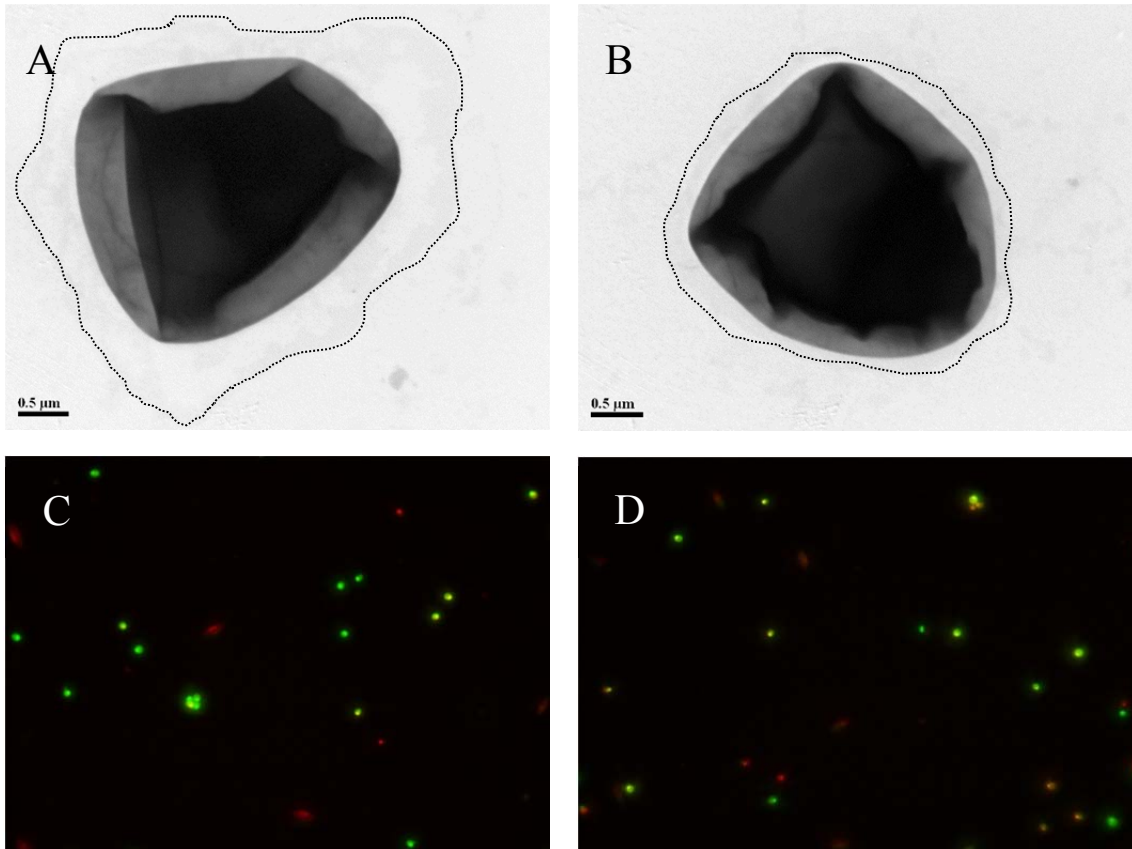

102

103 **Fig S3.** Transmission electron microscope images of the intact algal cells (A) and EPS-extracted  
104 cells (B), with the extracellular polysaccharide layers dyed by the polysaccharide stain uranyl  
105 acetate and circled by dashed lines; fluorescence microscope images of the intact algal cells (C) and  
106 EPS-extracted cells (D), with the live cells dyed by the green-fluorescent nucleic acid stain (SYTO  
107 9) and the dead cells dyed by the red-fluorescent nucleic acid stain (propidium iodide, PI).

108

109

110

111

112

113

114

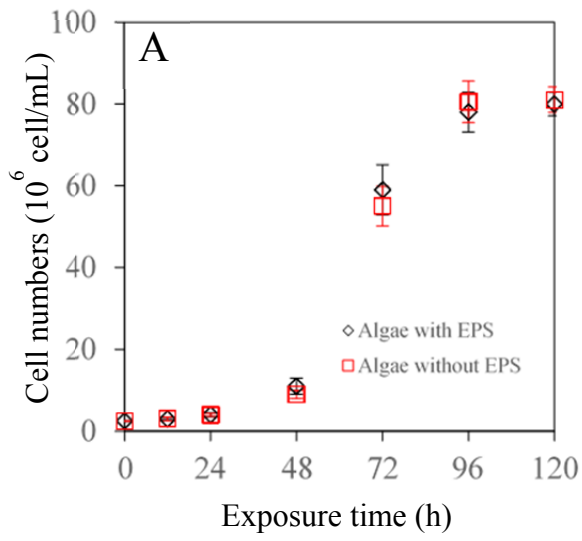

115

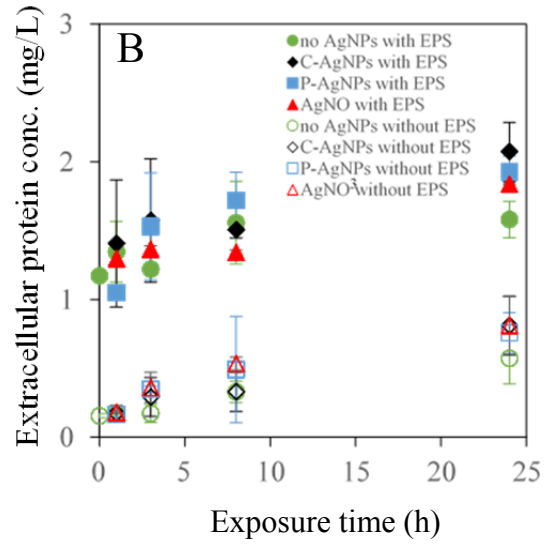

116 **Fig S4.** (A) Growth curves of algae with or without EPS and (B) secretion of extracellular protein  
117 by algae with or without EPS in the absence or presence of 50 µg/L AgNPs or 10 µg/L AgNO<sub>3</sub>.



118

119

120

121

122

123

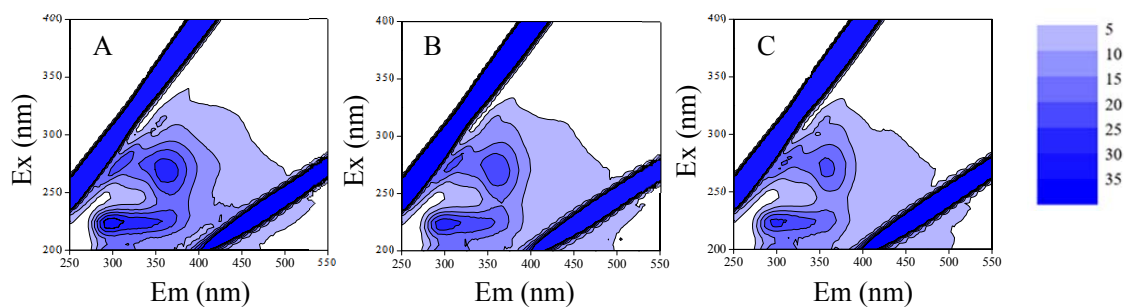

124

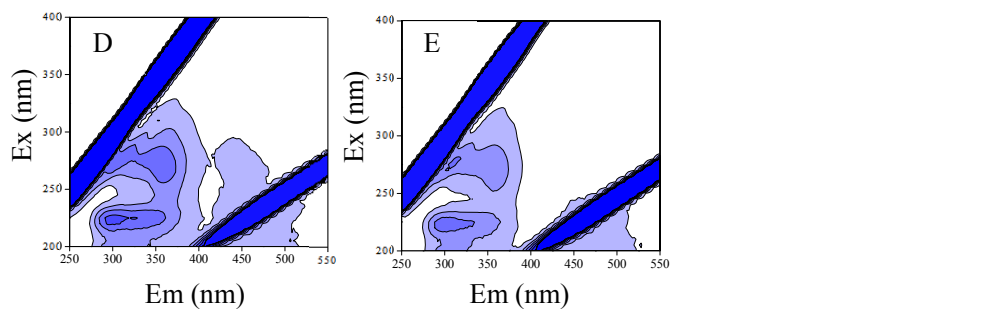

129

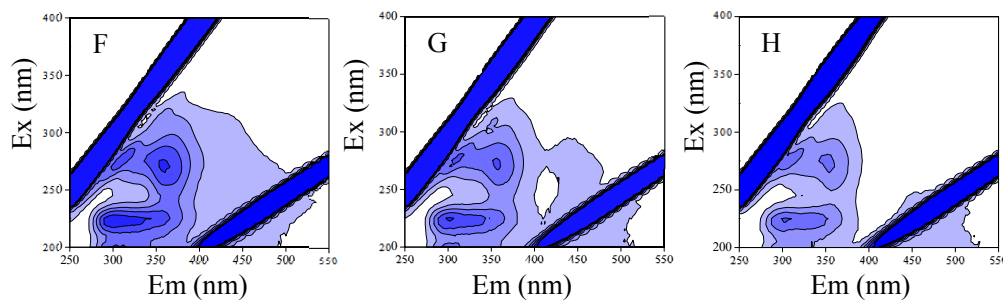

134

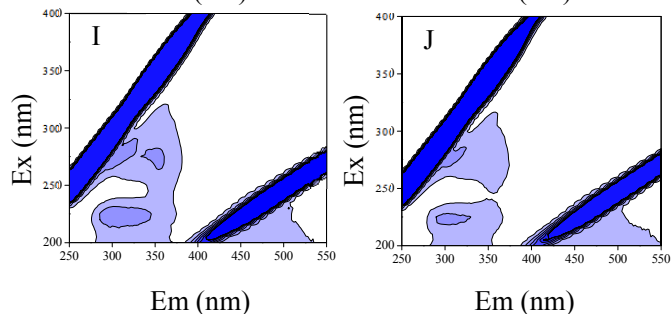

139

140 **Fig. S5.** Three-dimension excitation (220–400 nm) and emission (300–550 nm) matrix fluorescence  
141 (3D-EEM) spectra of 25 mg/L EPS with different concentrations (5, 10, 15, 20, and 25 mg/L) of the  
142 AgNPs (from A to E for C-AgNPs and from F to J for P-AgNPs, respectively), with two  
143 fluorescence peaks of EPS at EX/EM of 225/306 nm (peak A) and 275/360 nm (peak B) lowered  
144 and shifted after the addition of 5-25 mg/L AgNPs.
